# Supplementary material
Source: publisher figshare collection journal article supplement (https://gsapubs.figshare.com/articles/dataset/_/13356521)
Supplement: Supplementary file 1 [file 1]

Yang, H., Quigley, M., and King, T., 2020, Surface slip distributions and geometric complexity of intraplate reverse-faulting earthquakes: GSA Bulletin, <https://doi.org/10.1130/B35809.1>.

## Supplemental Material

**Table 1.** Published data for each event used in this manuscript

**Table 2.** Summary of preferred best fit models

**Table 3.** Description of the five models used to test the effects of depth and dip estimates on width and stress drop estimates

**Table 4.** Description of hypocentre OR centroid moment tensor OR modelled depths used for each model. In some cases (blue text) direct estimates for fault width were used. Models A & B use a variety of data, Models C & D use hypocentral depths (except where no reliable hypocentre data are published)

**Table 5.** Width results from Models A – D and Model E (Avg.) including L:W ratios, area, and average slip per area. Orange width values are direct from publications (Table 4) and not calculated using depth and dip. Green cells indicate width values used in our manuscript

**Table 6.** Stress drop results for Models A – D, and Model E (avg.) for four different stress drop calculations

**Table 7.** Various categorisations of data presented in our manuscript relative to the Type definitions 1, 2 and 3. Note that Types are defined predominately on how the geometric complexity of structures in the local bedrock (as proxied by geophysical analysis and surface geology) relates to the direction of regional  $S_{Hmax}$  (Rajabi et al., 2017).

**Table 8.** Cumulative sum of segment lengths per  $5^\circ$  increment of segment azimuth, where  $0^\circ$  is  $S_{Hmax}$  perpendicular and  $90^\circ$  is  $S_{Hmax}$  parallel. I.e. Faults with total lengths close to  $0^\circ$  are more optimally aligned for reverse failure relative to  $S_{Hmax}$ . Input data for these calculations are presented in Table 10.

**Table 9.** Summary of the orientation of segments relative to  $S_{Hmax}$  for each Type.

**Table 10.**  $S_{Hmax}$  direction, and segment length and azimuth data for each earthquake

**Figure 1.** Comparison of the results from the ‘Mean’ stress drop (an average of ‘Moment’, ‘20 GPa’, ‘50 GPa’, and ‘Published’ across Models A – D, and Model E (which averages the widths from Models A – E).

**Figure 2.** Comparison of Width and L:W derived for Models A – E (Table 5)

**Figure 3.** Maps of fault segments as defined in Table 6 of King et al., 2019 (except Pukatja and Calingiri) with lengths and azimuthal bearings (between  $000^\circ$  –  $180^\circ$ ). In some cases total lengths differ from those used in this manuscript (see Table 10). The number of segments defined for Pukatja and Calingiri differ from Table 6 of King et al., 2019 to better capture the azimuthal changes within those surface ruptures. Azimuths are calculated from end to end of each line shown.

**Table 1.** Published data for each event used in this manuscript

| Event         | Mw <sup>1</sup> | Length [km] <sup>2</sup> | Avg. net-slip (AD) [m] <sup>3</sup> | Max. net-slip (MD) [m] <sup>4</sup> | AD:MD | Pub. Stress drop [MPa] | Stress drop reference     | % DC <sup>5</sup> | % DC Reference                |
|---------------|-----------------|--------------------------|-------------------------------------|-------------------------------------|-------|------------------------|---------------------------|-------------------|-------------------------------|
| Meckering     | 6.6             | 39                       | 1.67                                | 3.7                                 | 0.49  | 9.0                    | (Denham et al., 1980)     | 66                | (Vogfjord and Langston, 1987) |
| Calingiri     | 5.0             | 4.0                      | 0.31                                | 1.3                                 | 0.27  | 9.0                    | (Denham et al., 1980)     |                   |                               |
| Cadoux        | 6.1             | 23                       | 0.47                                | 1.8                                 | 0.28  | 2.0                    | (Denham et al., 1987)     | 94                | USGS <sup>6</sup>             |
| Marryat Creek | 5.7             | 14                       | 0.31                                | 1.1                                 | 0.27  |                        |                           | 98                | USGS <sup>6</sup>             |
| Kunayungku    | 6.3             | 9.2                      | 0.58                                | 1.4                                 | 0.43  | 5.8                    | (Choy and Bowman, 1990)   | 79                | (Choy and Bowman, 1990)       |
| LSW           | 6.4             | 8.3                      | 1.08                                | 2.3                                 | 0.43  | 13.0                   | (Choy and Bowman, 1990)   | 40                | (Choy and Bowman, 1990)       |
| LSE           | 6.6             | 17.2                     | 1.15                                | 3.6                                 | 0.33  | 8.6                    | (Choy and Bowman, 1990)   | 100               | (Choy and Bowman, 1990)       |
| Katanning     | 4.7             | 2.5                      | 0.17                                | 0.3                                 | 0.67  | 20.5 (14-27)           | (Dawson et al., 2008)     |                   |                               |
| Pukatja       | 5.2             | 1.6                      | 0.26                                | 1.0                                 | 0.25  |                        |                           | 98                | USGS <sup>6</sup>             |
| Petermann     | 6.1             | 22                       | 0.35                                | 1.9                                 | 0.13  | 2.2                    | (Attanayake et al., 2020) | 88                | USGS <sup>6</sup>             |
| Lake Muir     | 5.3             | 7.1                      | 0.28                                | 0.75                                | 0.38  |                        |                           | 95                | USGS <sup>6</sup>             |

<sup>1</sup> Magnitude values from (Allen et al., 2018), Lake Muir from (D. J. Clark et al., 2020); <sup>2</sup> Length values from this paper; <sup>3</sup> Average net slip values from this paper (these vary from (King et al., 2019) as they include interpolated data points as described in the manuscript); <sup>4</sup> Maximum net-slip values from (King et al., 2019) and references therein, Lake Muir from (D. J. Clark et al., 2020) <sup>5</sup> percent double couple of focal mechanisms <sup>6</sup>DC is documented for these events in a .out file from the online USGS earthquake database, accessed on 20/10/2020

**Table 2.** Summary of preferred best fit models

| Event         | Preferred best fit |                |           |       | Rup. Dir.  | Taper (10 <sup>-4</sup> ) | Loc. of MD        | S-transform analysis of slip residuals |                            |                      |
|---------------|--------------------|----------------|-----------|-------|------------|---------------------------|-------------------|----------------------------------------|----------------------------|----------------------|
|               | Form               | R <sup>2</sup> | RMSE      | Sym.  |            |                           |                   | Dominant spatial frequency             | Loc. of high-freq. MD (km) | Structure for spikes |
| Meckering     | Triangle           | 0.75           | 0.27      | Sym.  | Bilateral. | - / 1.4                   | Bend/Intersection | 1, 2                                   | -                          | -                    |
| Calingiri     | Ellipse            | 0.68           | 0.49      | Asym. | Bilateral  | 11.9 / 1.9                | Bend/Stepover     | 3                                      | 1.3 - 2.0                  | Bend/Stepover        |
| Cadoux        | Triangle           | 0.32           | 0.77      | Asym. | Unilateral | 3.2 / 4.4                 | Bend              | 1                                      | 13 - 15                    | Intersection         |
| Marryat Creek | Ellipse            | 0.64           | 0.38      | Sym.  |            | 1.2 / 0.7                 | Intersection      | 2, 3                                   | 4.5 - 6                    | Intersection         |
| Kunayungku    | Triangle           | 0.72           | 0.32      | Sym.  | Unilateral | 2.4 / 2.6                 |                   | 1, 2                                   | -                          | -                    |
| LSW           | Ellipse (box)      | 0.20           | 0.44      | Sym.  | Unilateral | 2.9 / 12.2                |                   | 1                                      | -                          | -                    |
| LSE           | Ellipse (box)      | 0.02           | 0.51      | Sym.  | Bilateral  | 6.0 / 1.9                 | Bend              | 1                                      | 6 - 9                      | Bend                 |
| Katanning     | Ellipse            | 0.82           | 0.21      | Sym.  | Unilateral | 3.7 / 5.0                 |                   | 1                                      | -                          | -                    |
| Pukatja       | Triangle           | 0.62           | 0.62      | Asym. |            | 4.2 / 29.2                | Bend/Stepover     | 1 - 4                                  | -                          | -                    |
| Petermann     | Ellipse (box)      | 0.18           | 0.70      | Sym.  | Bilateral  | 1.9 / 1.4                 | Stepover          | 1                                      | 7 - 9                      | Stepover             |
| Lake Muir     | Triangle           | 0.56           | 0.42      | Asym. |            | 2.8 / 1.1                 | Bend              | 2                                      | -                          | -                    |
| Average       |                    | 0.50±0.27      | 0.47±0.18 |       |            | 2.7 ±1.5                  |                   |                                        |                            |                      |

**Table 3.** Description of the five models used to test the effects of depth and dip estimates on width and stress drop estimates

| Model    | Depth/width description                    | Dip                                     |
|----------|--------------------------------------------|-----------------------------------------|
| <b>A</b> | Mixture of CMT, hypocenter, modelled width | 45°                                     |
| <b>B</b> | Mixture of CMT, hypocenter, modelled width | Preferred dips from (King et al., 2019) |
| <b>C</b> | Hypocentral depths (where possible)        | 45°                                     |
| <b>D</b> | Hypocentral depths (where possible)        | Preferred dips from (King et al., 2019) |
| <b>E</b> | Average width derived from Models A – E    |                                         |

**Table 4.** Description of hypocenter OR centroid moment tensor OR modeled depths used for each model. In some cases (blue text) direct estimates for fault width were used. Models A and B use a variety of data, Models C and D use hypocentral depths (except where no reliable hypocenter data are published)

| Event                | Model A and B            |                                                                                               |                                                   | Model C and D            |                                                      |                                                 |
|----------------------|--------------------------|-----------------------------------------------------------------------------------------------|---------------------------------------------------|--------------------------|------------------------------------------------------|-------------------------------------------------|
|                      | Depth<br>(Width)<br>[km] | Detail                                                                                        | REF.                                              | Depth<br>(Width)<br>[km] | Detail                                               | REF.                                            |
| <b>Meckering</b>     | <b>10</b>                | Width of fault based on balancing seismic moment, length (37 km), and dip of 37°              | (Vogfjord and Langston, 1987)                     | 7                        | Hypocentre from local instrument network             | (Everingham, 1968)                              |
| <b>Calingiri</b>     | 1                        | Hypocentre from 29 local instrumental records                                                 | ( <del>P</del> -J Gregson, 1971)                  | 1                        | Hypocentre from 29 instrumental records              | ( <del>P</del> -J Gregson, 1971)                |
| <b>Cadoux</b>        | 3                        | Unknown – assumed hypocentre                                                                  | Geoscience Australia online earthquake catalogue  | 6                        | Hypocentre from teleseismic (?) data                 | (Denham et al., 1987)                           |
| <b>Marryat Creek</b> | 3                        | Centroid Moment Tensor (CMT) depth (i.e. not ‘initiation’ depth)                              | (Fredrich et al., 1988)                           | 5                        | Hypocentre from local instrument network             | ( <del>Peter</del> -J Gregson and Moiler, 1990) |
| <b>Kunayungku</b>    | <b>10</b>                | Fault width estimated from modelled fault fit to surface offsets measured by repeat surveying | (Bowman, 1991)                                    | 6.5                      | Hypocentre from local and teleseismic broadband data | (Choy and Bowman, 1990)                         |
| <b>LSW</b>           | <b>12</b>                |                                                                                               |                                                   | 3.5                      |                                                      |                                                 |
| <b>LSE</b>           | <b>16</b>                |                                                                                               |                                                   | 4.5                      |                                                      |                                                 |
| <b>Katanning</b>     | 0.9                      | Bottom of the fault from InSAR inversion (pure thrust model)                                  | (Dawson et al., 2008)                             | <b>1</b>                 | Fault width from InSAR inversion (pure thrust model) | (Dawson et al., 2008)                           |
| <b>Pukatja</b>       | 4                        | CMT Depth                                                                                     | ( <del>D</del> -Clark et al., 2014)               | 4                        | CMT – same as Model A and B                          |                                                 |
| <b>Petermann</b>     | <b>4</b>                 | Fault width estimate from CMT model and InSAR inversion                                       | (Hejrani and Tkalčić, 2018; Polcari et al., 2018) | <b>4</b>                 | Fault width – same as Model A and B                  |                                                 |
| <b>Lake Muir</b>     | 1.7                      | Hypocentre depth from Geoscience Australia                                                    | ( <del>D</del> -J-Clark et al., 2020)             | 1.7                      | Same as Model A and B                                |                                                 |

**Table 5.** Width results from Models A – D and Model E (Avg.) including L:W ratios, area, and average slip per area. Orange width values are direct from publications (**Table 4**) and not calculated using depth and dip. Green cells indicate width values used in our manuscript

| Event         | Width [km] |       |      |       |       | SRL : W |      |      |      |     | Area [km <sup>2</sup> ] |     |     |     |     | Avg. Slip (AD) / Area |       |       |       |       |
|---------------|------------|-------|------|-------|-------|---------|------|------|------|-----|-------------------------|-----|-----|-----|-----|-----------------------|-------|-------|-------|-------|
|               | A          | B     | C    | D     | E     | A       | B    | C    | D    | E   | A                       | B   | C   | D   | E   | A                     | B     | C     | D     | E     |
| Meckering     | 10.00      | 10.00 | 9.90 | 12.20 | 10.53 | 3.90    | 3.90 | 3.94 | 3.20 | 3.7 | 390                     | 390 | 386 | 476 | 411 | 0.004                 | 0.004 | 0.004 | 0.004 | 0.004 |
| Calingiri     | 1.41       | 2.92  | 1.41 | 2.92  | 2.17  | 2.83    | 1.37 | 2.83 | 1.37 | 1.8 | 6                       | 12  | 6   | 12  | 9   | 0.055                 | 0.027 | 0.055 | 0.027 | 0.036 |
| Cadoux        | 4.24       | 3.46  | 8.49 | 6.93  | 5.78  | 5.42    | 6.64 | 2.71 | 3.32 | 4.0 | 98                      | 80  | 195 | 159 | 133 | 0.005                 | 0.006 | 0.002 | 0.003 | 0.004 |
| Marryat Creek | 4.24       | 4.67  | 7.07 | 7.78  | 5.94  | 3.30    | 3.00 | 1.98 | 1.80 | 2.4 | 59                      | 65  | 99  | 109 | 83  | 0.005                 | 0.005 | 0.003 | 0.003 | 0.004 |
| Kunayungku    | 10         | 10    | 9.19 | 10.11 | 9.83  | 0.9     | 0.9  | 1.00 | 0.91 | 0.9 | 92                      | 92  | 85  | 93  | 90  | 0.006                 | 0.006 | 0.007 | 0.006 | 0.006 |
| LSW           | 12         | 12    | 4.95 | 4.04  | 8.25  | 0.7     | 0.7  | 1.68 | 2.05 | 1.0 | 100                     | 100 | 41  | 34  | 68  | 0.011                 | 0.011 | 0.026 | 0.032 | 0.016 |
| LSE           | 16         | 16    | 6.36 | 7.85  | 11.55 | 1.1     | 1.1  | 2.70 | 2.19 | 1.5 | 275                     | 275 | 109 | 135 | 199 | 0.004                 | 0.004 | 0.011 | 0.009 | 0.006 |
| Katanning     | 1.27       | 1.40  | 1.00 | 1.00  | 1.17  | 1.96    | 1.79 | 2.50 | 2.50 | 2.1 | 3                       | 4   | 3   | 3   | 3   | 0.055                 | 0.050 | 0.069 | 0.069 | 0.059 |
| Pukatja       | 5.66       | 8.00  | 5.66 | 8.00  | 6.83  | 0.28    | 0.20 | 0.28 | 0.20 | 0.2 | 9                       | 13  | 9   | 13  | 11  | 0.029                 | 0.020 | 0.029 | 0.020 | 0.024 |
| Petermann     | 4.00       | 4.00  | 4.00 | 4.00  | 4.00  | 5.50    | 5.50 | 5.50 | 5.50 | 5.5 | 88                      | 88  | 88  | 88  | 88  | 0.004                 | 0.004 | 0.004 | 0.004 | 0.004 |
| Lake Muir     | 2.40       | 2.22  | 2.40 | 2.22  | 2.31  | 2.95    | 3.20 | 2.95 | 3.20 | 3.1 | 17                      | 16  | 17  | 16  | 16  | 0.017                 | 0.018 | 0.017 | 0.018 | 0.017 |

**Table 6.** Stress drop results for Models A – D, and Model E (avg.) for four different stress drop calculations

| Event         | Moment based <sup>1</sup> |     |      |      |     | 20 GPa <sup>2</sup> |     |     |     |     | 50 GPa <sup>2</sup> |     |      |      |     | Mean <sup>4</sup> |           |           |           |                |
|---------------|---------------------------|-----|------|------|-----|---------------------|-----|-----|-----|-----|---------------------|-----|------|------|-----|-------------------|-----------|-----------|-----------|----------------|
|               | A                         | B   | C    | D    | E   | A                   | B   | C   | D   | E.  | A                   | B   | C    | D    | E.  | A                 | B         | C         | D         | E <sup>4</sup> |
| Meckering     | 1.4                       | 1.4 | 1.4  | 0.9  | 1.2 | 2.8                 | 2.8 | 2.8 | 2.4 | 2.7 | 7.0                 | 7.0 | 7.0  | 5.9  | 6.7 | 5.0               | 5.0       | 5.1       | 4.6       | 4.9 ± 3.2      |
| Calingiri     | 5.6                       | 1.7 | 5.6  | 1.7  | 2.7 | 3.9                 | 2.5 | 3.9 | 2.5 | 2.9 | 9.8                 | 6.2 | 9.8  | 6.2  | 7.3 | 7.1               | 4.8       | 7.1       | 4.8       | 6.0 ± 3.0      |
| Cadoux        | 3.1                       | 4.5 | 0.9  | 1.2  | 1.7 | 1.8                 | 2.1 | 1.0 | 1.2 | 1.3 | 4.4                 | 5.3 | 2.5  | 2.9  | 3.4 | 2.8               | 3.5       | 1.6       | 1.8       | 2.4 ± 1.3      |
| Marryat Creek | 1.4                       | 1.1 | 0.6  | 0.5  | 0.8 | 1.3                 | 1.2 | 0.9 | 0.8 | 1.0 | 3.1                 | 2.9 | 2.2  | 2.0  | 2.4 | 1.9               | 1.7       | 1.2       | 1.1       | 1.5 ± 0.9      |
| Kunayungku    | 3.2                       | 3.2 | 4.0  | 3.1  | 3.3 | 1.7                 | 1.7 | 1.7 | 1.7 | 1.7 | 4.2                 | 4.2 | 4.4  | 4.1  | 4.2 | 3.7               | 3.7       | 4.0       | 3.7       | 3.8 ± 1.5      |
| LSW           | 3.0                       | 3.0 | 16.4 | 22.8 | 7.7 | 2.9                 | 2.9 | 4.6 | 5.2 | 3.6 | 7.3                 | 7.3 | 11.5 | 13.1 | 9.0 | 6.6               | 6.6       | 11.4      | 13.5      | 9.5 ± 5.9      |
| LSE           | 2.7                       | 2.7 | 11.5 | 8.1  | 4.3 | 1.9                 | 1.9 | 3.3 | 2.8 | 2.2 | 4.8                 | 4.8 | 8.2  | 7.0  | 5.6 | 4.5               | 4.5       | 7.9       | 6.6       | 5.9 ± 3.1      |
| Katanning     | 4.4                       | 3.7 | 6.5  | 6.5  | 5.0 | 2.7                 | 2.6 | 3.2 | 3.2 | 2.9 | 6.8                 | 6.4 | 8.0  | 8.0  | 7.2 | 8.6               | 8.3       | 9.6       | 9.6       | 9.0 ± 7.1      |
| Pukatja       | 2.3                       | 1.1 | 2.3  | 1.1  | 1.6 | 2.8                 | 2.6 | 2.8 | 2.6 | 2.7 | 6.9                 | 6.6 | 6.9  | 6.6  | 6.7 | 4.0               | 3.4       | 4.0       | 3.4       | 3.7 ± 2.3      |
| Petermann     | 3.6                       | 3.6 | 3.6  | 3.6  | 3.6 | 1.4                 | 1.4 | 1.4 | 1.4 | 1.4 | 3.5                 | 3.5 | 3.5  | 3.5  | 3.5 | 2.7               | 2.7       | 2.7       | 2.7       | 2.7 ± 1.0      |
| Lake Muir     | 2.2                       | 2.5 | 2.2  | 2.5  | 2.3 | 2.1                 | 2.2 | 2.1 | 2.2 | 2.1 | 5.2                 | 5.5 | 5.2  | 5.5  | 5.4 | 3.1               | 3.4       | 3.1       | 3.4       | 3.3 ± 1.6      |
| Averages      | 3.0                       | 2.6 | 5.0  | 4.7  | 3.1 | 2.3                 | 2.2 | 2.5 | 2.4 | 2.2 | 5.7                 | 5.4 | 6.3  | 5.9  | 5.6 | 4.9 ± 3.0         | 4.7 ± 3.0 | 5.6 ± 2.6 | 5.4 ± 2.7 | 4.8 ± 2.8      |

<sup>1</sup> ‘Moment’ stress drop is derived from the method of (Madariaga, 1977) using  $\Delta\sigma = \frac{M_0}{CSW}$  where  $M_0$  is derived from  $M_w$ ,  $C$  is a coefficient derived from  $L$  and  $W$  (assuming an elliptical fault plane), and  $W$  is width

<sup>2</sup> ‘20 GPa’ and ‘50GPa’ stress drops are derived from the method of (Griffith et al., 2009) based on (Madariaga, 1977) using  $\Delta\sigma = \frac{\mu}{C^2} \frac{\Delta D}{W}$ , where  $\mu$  is shear modulus at either 20GPa or 50GPa,  $C$  is a coefficient derived from  $L$  and  $W$  (assuming an elliptical fault plane),  $W$  is width, and  $\Delta D = \frac{AD}{L}$

<sup>3</sup> ‘Mean Value’ is the mean of all ‘Moment’, ‘20GPa’, ‘50GPa’, and published (Table 1) stress drop estimates. These values are reported in the main manuscript text and figures

<sup>4</sup> Values and standard deviation for each event are calculated from the 16 values in Models A – D for each event. Average stress drop of all events is calculated by a combined average of the 176 stress drops calculated in Models A – D, and standard deviation is calculated on the 11 average values of Model E.

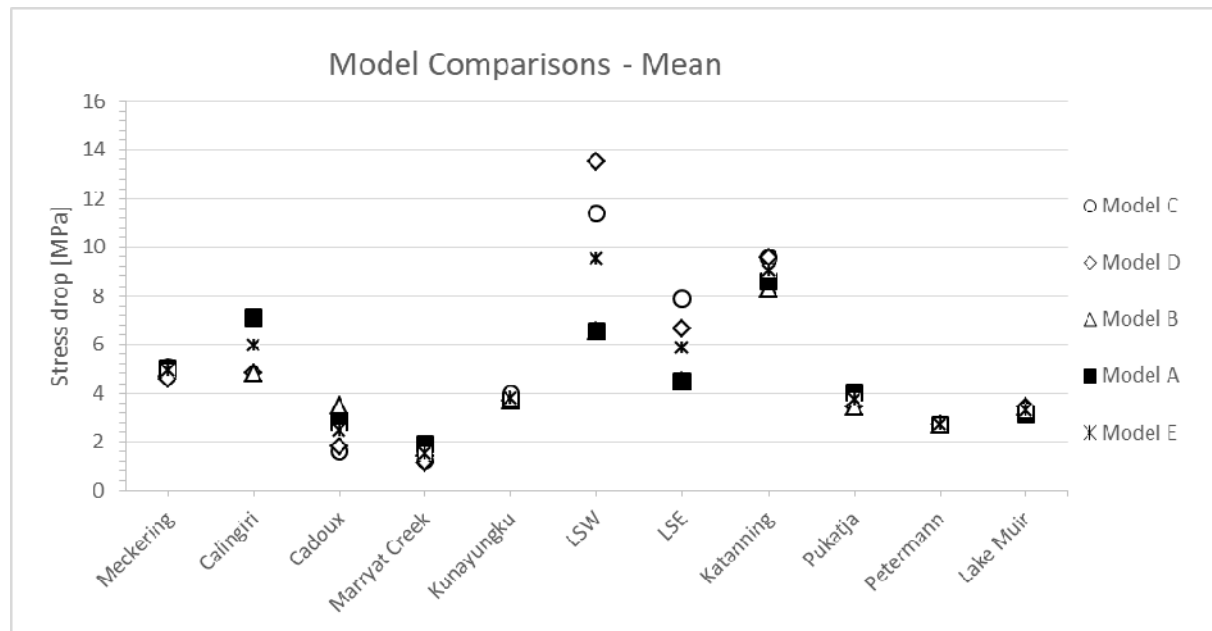

Figure 1. Comparison of the results from the 'Mean' stress drop (an average of 'Moment', '20 GPa', '50 GPa', and 'Published' across Models A – D, and Model E (which averages the widths from Models A – E).

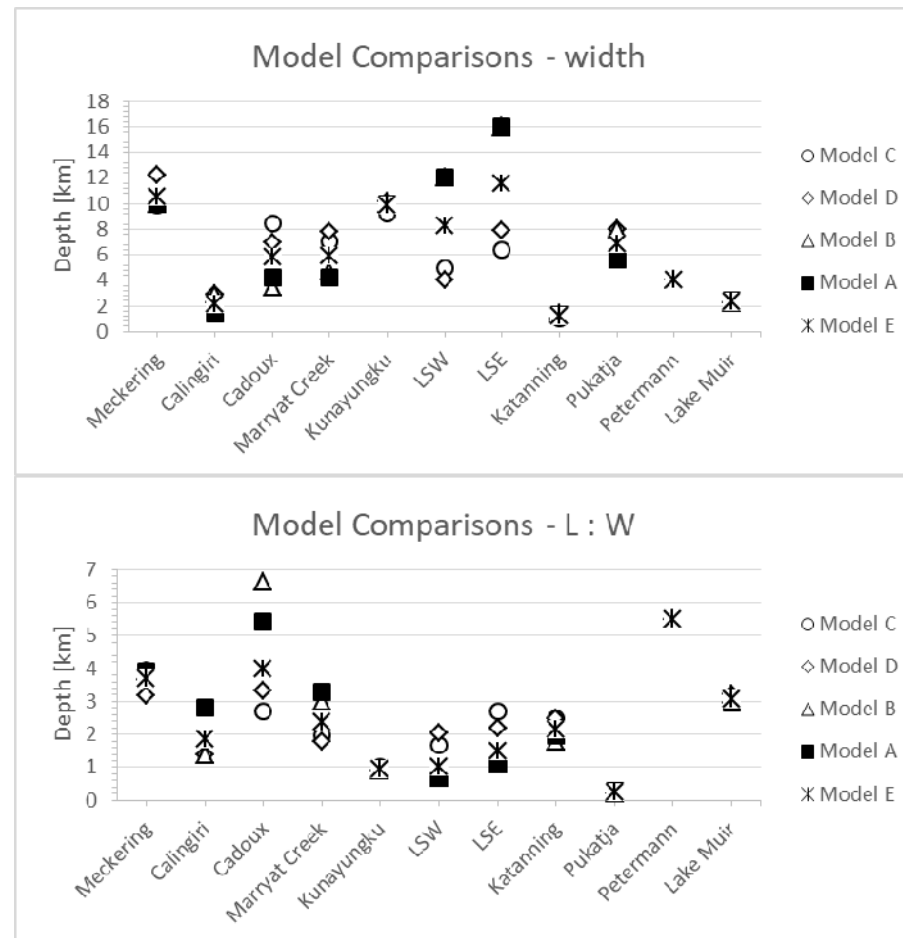

Figure 2. Comparison of Width and L:W derived for Models A – E (**Table 5**)

**Table 7.** Various categorisations of data presented in our manuscript relative to the Type definitions 1, 2 and 3. Note that Types are defined predominately on how the geometric complexity of structures in the local bedrock (as proxied by geophysical analysis and surface geology) relates to the direction of regional  $S_{Hmax}$  (Rajabi et al., 2017).

| Type:                                     |                                               | 1           | 2                        | 3      |
|-------------------------------------------|-----------------------------------------------|-------------|--------------------------|--------|
| Events:                                   |                                               | PT, KN, LSE | PK, KT, MC, MCK, CL, LSW | LM, CD |
| Rupture trace                             | Straight (low geometric/kinematic complexity) | PT, KN      | CL, LSW, KT              |        |
|                                           | Intersecting faults                           |             | MC, MCK                  |        |
|                                           | Segmented                                     |             |                          | CD?    |
|                                           | Multiple curved                               | LSE         | PK                       | LM     |
| Angle to $S_{HMax}$ and gravity gradients | Optimally orientated $\sim 90^\circ$          | PT, KN, LSE | CL                       | LM     |
|                                           | Variable 0 to $\pm 90^\circ$                  |             | PK, KT, MC, MCK, LSW     | CD     |
| Kinematics                                | Reverse                                       | PT, KN, LSE | CL, KT?                  | LM?    |
|                                           | Reverse + strike-slip                         |             | PK, MC, MCK, LSW         | CD     |
| Percent double couple                     | High > 75%                                    | PT, LSE     | PK, MC                   | LM, CD |
|                                           | Moderate 40-75%                               | KN          | LSW, MC                  |        |
|                                           | N/A                                           |             | KT, CL                   |        |
| Stress drop                               | Low < 3.5 Mpa                                 | PT          | MC                       | LM, CD |
|                                           | Moderate 3.5 - 7.5 Mpa                        | KN, LSE     | MCK, CL                  |        |
|                                           | High > 7.5 Mpa                                |             | KT, LSW                  |        |
| Symmetry                                  | Symmetrical                                   | PT, KN, LSE | MCK, MC, KT              |        |
|                                           | Asymmetrical                                  |             | CL, LSW                  | LM, CD |
| Location of MD                            | Middle third                                  | PT, KN, LSE | MCK, MC, KT, CL          | LM?    |
|                                           | Outside middle third                          |             | LSW                      | CD, LM |
| Location of higher slip taper gradient    | Fault bend                                    | LSE         | CL                       | LM     |
|                                           | Step-overs                                    | PT          |                          |        |
|                                           | Fault intersection                            |             | MCK, MC                  | CD     |
|                                           | N/A                                           | KN          | KT, LSW                  |        |

PT = Petermann, KN = Katanning, LSE = Lake Surprise East, PK = Pukatja, KT = Katanning, MC = Marryat Creek, MCK = Meckering, CL = Calingiri, LSW = Lake Surprise West, LM = Lake Muir, CD = Cadoux



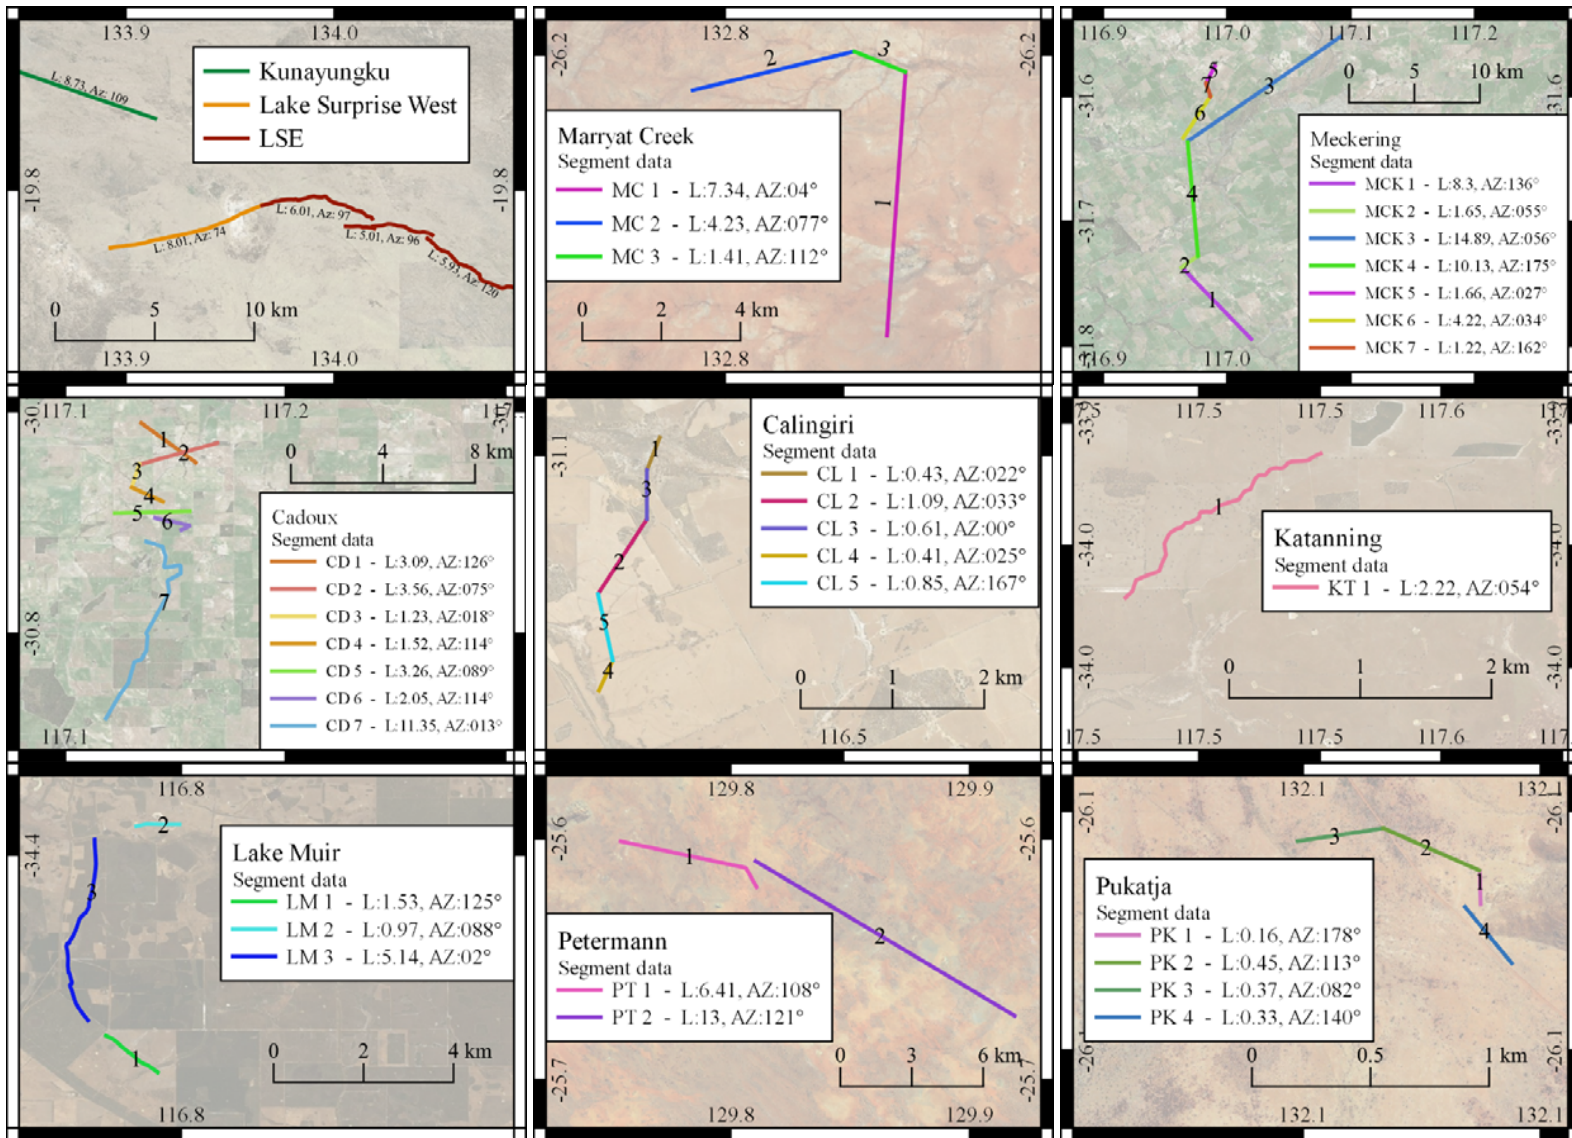

Figure 3. Maps of fault segments as defined in Table 6 of King et al., 2019 (except Pukatja and Calingiri) with lengths and azimuthal bearings (between 000° – 180°). In some cases total lengths differ from those used in this manuscript (see **Table 9**). The number of segments defined for Pukatja and Calingiri differ from Table 6 of King et al., 2019 to better capture the azimuthal changes within those surface ruptures. Azimuths are calculated from end to end of each line shown.

**Table 8.** Cumulative sum of segment lengths per 5° increment of segment azimuth, where 0° is S<sub>HMax</sub> perpendicular and 90° is S<sub>HMax</sub> parallel. I.e., Faults with total lengths close to 0° are more optimally aligned for reverse failure relative to S<sub>HMax</sub>. Input data for these calculations are presented in **Table 9**.

| Cumulative percent of length per 5° bin |           |           |        |               |            |      |      |           |         |           |           |        |        |        |
|-----------------------------------------|-----------|-----------|--------|---------------|------------|------|------|-----------|---------|-----------|-----------|--------|--------|--------|
| Degrees                                 | Meckering | Calingiri | Cadoux | Marryat Creek | Kunayungku | LSW  | LSE  | Katanning | Pukatja | Petermann | Lake Muir | Type 1 | Type 2 | Type 3 |
| 0 - 5                                   | 24%       | 18%       | 0%     | 0%            | 0%         | 0%   | 0%   | 0%        | 0%      | 0%        | 67%       | 0%     | 7%     | 34%    |
| 5 - 10                                  | 24%       | 18%       | 0%     | 0%            | 0%         | 0%   | 0%   | 0%        | 0%      | 0%        | 67%       | 0%     | 7%     | 34%    |
| 10 - 15                                 | 24%       | 43%       | 44%    | 0%            | 0%         | 0%   | 0%   | 0%        | 0%      | 0%        | 67%       | 0%     | 11%    | 55%    |
| 15 - 20                                 | 27%       | 43%       | 48%    | 0%            | 0%         | 0%   | 0%   | 0%        | 29%     | 0%        | 67%       | 0%     | 16%    | 58%    |
| 20 - 25                                 | 27%       | 68%       | 48%    | 0%            | 0%         | 0%   | 0%   | 0%        | 29%     | 0%        | 67%       | 0%     | 21%    | 58%    |
| 25 - 30                                 | 31%       | 68%       | 48%    | 57%           | 0%         | 0%   | 35%  | 0%        | 29%     | 0%        | 67%       | 12%    | 31%    | 58%    |
| 30 - 35                                 | 41%       | 100%      | 48%    | 57%           | 0%         | 0%   | 35%  | 0%        | 29%     | 67%       | 67%       | 34%    | 38%    | 58%    |
| 35 - 40                                 | 41%       | 100%      | 48%    | 57%           | 100%       | 0%   | 35%  | 0%        | 29%     | 67%       | 67%       | 67%    | 38%    | 58%    |
| 40 - 45                                 | 96%       | 100%      | 48%    | 67%           | 100%       | 0%   | 35%  | 0%        | 29%     | 67%       | 67%       | 67%    | 49%    | 58%    |
| 45 - 50                                 | 96%       | 100%      | 48%    | 67%           | 100%       | 0%   | 35%  | 0%        | 68%     | 100%      | 67%       | 78%    | 55%    | 58%    |
| 50 - 55                                 | 100%      | 100%      | 60%    | 67%           | 100%       | 0%   | 100% | 100%      | 68%     | 100%      | 87%       | 100%   | 73%    | 74%    |
| 55 - 60                                 | 100%      | 100%      | 60%    | 67%           | 100%       | 0%   | 100% | 100%      | 68%     | 100%      | 87%       | 100%   | 73%    | 74%    |
| 60 - 65                                 | 100%      | 100%      | 60%    | 67%           | 100%       | 0%   | 100% | 100%      | 68%     | 100%      | 87%       | 100%   | 73%    | 74%    |
| 65 - 70                                 | 100%      | 100%      | 74%    | 67%           | 100%       | 0%   | 100% | 100%      | 68%     | 100%      | 87%       | 100%   | 73%    | 81%    |
| 70 - 75                                 | 100%      | 100%      | 87%    | 67%           | 100%       | 100% | 100% | 100%      | 68%     | 100%      | 87%       | 100%   | 89%    | 87%    |
| 75 - 80                                 | 100%      | 100%      | 87%    | 100%          | 100%       | 100% | 100% | 100%      | 100%    | 100%      | 87%       | 100%   | 100%   | 87%    |
| 80 - 85                                 | 100%      | 100%      | 87%    | 100%          | 100%       | 100% | 100% | 100%      | 100%    | 100%      | 87%       | 100%   | 100%   | 87%    |
| 85 - 85                                 | 100%      | 100%      | 87%    | 100%          | 100%       | 100% | 100% | 100%      | 100%    | 100%      | 87%       | 100%   | 100%   | 87%    |
| 85 - 90                                 | 100%      | 100%      | 100%   | 100%          | 100%       | 100% | 100% | 100%      | 100%    | 100%      | 100%      | 100%   | 100%   | 100%   |

**Table 9.** Summary of the orientation of segments relative to  $S_{Hmax}$  for each Type.

|               | Events                      | Num.<br>Events | Num.<br>segments | Orientation of segments relative to optimal<br>( $S_{Hmax} \pm 90$ ) |     |         |          |
|---------------|-----------------------------|----------------|------------------|----------------------------------------------------------------------|-----|---------|----------|
|               |                             |                |                  | Min.                                                                 | Max | Average | St. Dev  |
| <b>Type 1</b> | PT, LSE, KN                 | 3              | 6                | 28                                                                   | 52  | 36      | $\pm 18$ |
| <b>Type 2</b> | MCK, CL, MC,<br>LSW, KT, PK | 6              | 21               | 0                                                                    | 80  | 37      | $\pm 23$ |
| <b>Type 3</b> | CD, LM                      | 2              | 9                | 3                                                                    | 89  | 53      | $\pm 31$ |

**Table 10.**  $S_{Hmax}$  direction, and segment length and azimuth data for each earthquake

| Event         | SRL<br>[km] | Sum<br>seg. L<br>[km] <sup>1</sup> | $S_{Hmax}$ <sup>2</sup> | $S_{Hmax} \pm 90$ | Num.<br>of<br>Seg. <sup>3</sup> | Segment length [km] |      |     |      |     |     |      | Segment azimuth [°] |     |     |     |     |     |     | Diff. to $S_{Hmax} \pm 90^\circ$ [°] |    |    |    |    |    |    |
|---------------|-------------|------------------------------------|-------------------------|-------------------|---------------------------------|---------------------|------|-----|------|-----|-----|------|---------------------|-----|-----|-----|-----|-----|-----|--------------------------------------|----|----|----|----|----|----|
|               |             |                                    |                         |                   |                                 | 1                   | 2    | 3   | 4    | 5   | 6   | 7    | 1                   | 2   | 3   | 4   | 5   | 6   | 7   | 1                                    | 2  | 3  | 4  | 5  | 6  | 7  |
| Meckering     | 39          | 42.1                               | 90                      | 180               | 7                               | 1.7                 | 4.2  | 1.7 | 14.9 | 8.3 | 1.2 | 10.1 | 027                 | 034 | 055 | 136 | 136 | 162 | 175 | 27                                   | 34 | 55 | 44 | 44 | 18 | 5  |
| Calingiri     | 4           | 3.4                                | 90                      | 180               | 5                               | 0.6                 | 0.4  | 0.4 | 1.1  | 0.9 |     |      | 000                 | 025 | 022 | 033 | 167 |     |     | 0                                    | 25 | 22 | 33 | 13 |    |    |
| Cadoux        | 23          | 26.1                               | 90                      | 180               | 6                               | 11.4                | 1.2  | 3.6 | 3.3  | 1.5 | 2.1 | 3.1  | 013                 | 018 | 075 | 089 | 114 | 114 | 126 | 13                                   | 18 | 75 | 89 | 66 | 66 | 54 |
| Marryat Creek | 14          | 13                                 | 67                      | 157               | 3                               | 7.3                 | 4.2  | 1.4 |      |     |     |      | 004                 | 77  | 112 |     |     |     |     | 27                                   | 80 | 45 |    |    |    |    |
| Kunayungku    | 9.2         | 8.7                                | 58                      | 148               | 1                               | 8.7                 |      |     |      |     |     |      | 109                 |     |     |     |     |     |     | 39                                   |    |    |    |    |    |    |
| LSW           | 8.3         | 8.0                                | 58                      | 148               | 2                               | 8.0                 |      |     |      |     |     |      | 74                  |     |     |     |     |     |     | 74                                   |    |    |    |    |    |    |
| LSE           | 17.2        | 17                                 | 58                      | 148               | 2                               | 5.9                 | 5.0  | 6.0 |      |     |     |      | 120                 | 096 | 097 |     |     |     |     | 28                                   | 52 | 51 |    |    |    |    |
| Katanning     | 2.5         | 2.2                                | 89                      | 179               | 1                               | 2.2                 |      |     |      |     |     |      | 054                 |     |     |     |     |     |     | 55                                   |    |    |    |    |    |    |
| Pukatja       | 1.6         | 1.2                                | 69                      | 159               | 3                               | 0.5                 | 0.4  | 0.3 |      |     |     |      | 113                 | 082 | 140 |     |     |     |     | 46                                   | 77 | 19 |    |    |    |    |
| Petermann     | 22          | 19.4                               | 64                      | 154               | 2                               | 6.4                 | 13.0 |     |      |     |     |      | 108                 | 121 |     |     |     |     |     | 46                                   | 33 |    |    |    |    |    |
| Lake Muir     | 7.1         | 7.6                                | 89                      | 179               | 3                               | 5.1                 | 1.0  | 1.5 |      |     |     |      | 02                  | 088 | 125 |     |     |     |     | 3                                    | 89 | 54 |    |    |    |    |

<sup>1</sup> Summed lengths of segments differ slightly from the SRL lengths used elsewhere in this manuscript. SRL length of Meckering differs significantly to summed segment length as segments include the Splinter fault, which is not included in the SRL of this manuscript but is included in King et al., 2019.

<sup>2</sup>  $S_{Hmax}$  is derived from Rajabi et al., 2017.

<sup>3</sup> The number of segments comes from King et al., 2019 with the exception of Calingiri and Pukatja, where extra segmentation was added to accommodate changes in along-rupture azimuth (Fig. 3).

## REFERENCES CITED

- Allen, T., Leonard, M., Ghasemi, H., and Gibson, G., 2018, The 2018 National Seismic Hazard Assessment: Earthquake epicentre catalogue (GA Record 2018/30): Geoscience Australia, Commonwealth of Australia, <https://doi.org/https://doi.org/10.11636/Record.2018.030>.
- Attanayake, J., King, T.R., Quigley, M.C., Gibson, G., Clark, D., Jones, A., and Sandiford, M., 2020, Rupture Characteristics and the Structural Control of the 2016 Mw 6.1 Intraplate Earthquake in the Petermann Ranges, Australia: Bulletin of the Seismological Society of America, <https://doi.org/10.1785/0120190266>.
- Bowman, J.R., 1991, Geodetic evidence for conjugate faulting during the 1988 Tennant Creek, Australia earthquake sequence: Geophysical Journal International, v. 107, no. 1, p. 47–56, <https://doi.org/10.1111/j.1365-246X.1991.tb01155.x>.
- Choy, G.L., and Bowman, J.R., 1990, Rupture process of a multiple main shock sequence: analysis of teleseismic, local and field observations of the Tennant Creek, Australia, earthquakes of January 22, 1988: Journal of Geophysical Research, v. 95, B5, p. 6867–6882, <https://doi.org/10.1029/JB095iB05p06867>.
- Clark, D.J., Brennand, S., Brenn, G., Garthwaite, M.C., Dimech, J., Allen, T.I., and Standen, S., 2020, Surface deformation relating to the 2018 Lake Muir earthquake sequence, southwest Western Australia: New insight into stable continental region earthquakes: Solid Earth, v. 11, no. 2, p. 691–717, <https://doi.org/10.5194/se-11-691-2020>.
- Clark, D., McPherson, A., Allen, T., and De Kool, M., 2014, Coseismic surface deformation caused by the 23 March 2012 Mw 5.4 Ernabella (Pukatja) earthquake, central Australia: Implications for fault scaling relations in cratonic settings: Bulletin of the Seismological Society of America, v. 104, no. 1, p. 24–39, <https://doi.org/10.1785/0120120361>.
- Dawson, J., Cummins, P.R., Tregoning, P., and Leonard, M., 2008, Shallow intraplate earthquakes in Western Australia observed by Interferometric Synthetic Aperture Radar: Journal of Geophysical Research. Solid Earth, v. 113, no. 11, p. 1–19, <https://doi.org/10.1029/2008JB005807>.
- Denham, D., Alexander, L.G., Everingham, I.B., Gregson, P.J., McCaffrey, R., and Enever, J.R., 1987, The 1979 Cadoux earthquake and intraplate stress in Western Australia: Australian Journal of Earth Sciences, v. 34, no. 4, p. 507–521, <https://doi.org/10.1080/08120098708729429>.
- Denham, D., Alexander, L.G., and Worotnicki, G., 1980, The stress field near the sites of the Meckering (1968) and Calingiri (1970) earthquakes, Western Australia: Tectonophysics, v. 67, p. 283–317, [https://doi.org/10.1016/0040-1951\(80\)90271-1](https://doi.org/10.1016/0040-1951(80)90271-1).
- Everingham, I.B., 1968, Preliminary Report on the 14 October 1968 Earthquake at Meckering, Western Australia (BMR Record 1968/142) (1968/142): <https://doi.org/http://pid.geoscience.gov.au/dataset/ga/12254>.
- Fredrich, J., McCaffrey, R., and Denham, D., 1988, Source parameters of seven large Australian earthquakes determined by body waveform inversion: Geophysical Journal, v. 95, p. 1–13, <https://doi.org/10.1111/j.1365-246X.1988.tb00446.x>.
- Gregson, P.J., 1971, Mundaring Geophysical Observatory Annual Report, 1970 (BMR Record 1971/77): Bureau of Mineral Resources, Geology and Geophysics, <https://doi.org/http://pid.geoscience.gov.au/dataset/ga/12614>.
- Gregson, P.J., and Moiler, Y., 1990, Australian Seismological Report, 1986 (BMR Record 1990/294): Bureau of Mineral Resources, Geology and Geophysics, <https://doi.org/http://pid.geoscience.gov.au/dataset/ga/15206>.

- Griffith, W.A., Di Toro, G., Pennacchioni, G., Pollard, D.D., and Nielsen, S., 2009, Static stress drop associated with brittle slip events on exhumed faults: *Journal of Geophysical Research. Solid Earth*, v. 114, no. 2, p. 1–13, <https://doi.org/10.1029/2008JB005879>.
- Hejrani, B., and Tkalčić, H., 2018, The 20 May 2016 Petermann Ranges earthquake: centroid location, magnitude and focal mechanism from full waveform modelling: *Australian Journal of Earth Sciences*, v. 66, no. 1, p. 37–45, <https://doi.org/10.1080/08120099.2018.1525783>.
- King, T.R., Quigley, M.C., and Clark, D., 2019, Surface-rupturing historical earthquakes in Australia and their environmental effects: new insights from re-analyses of observational data: *Geosciences*, v. 9, no. 10, p. 1–34, <https://doi.org/10.3390/geosciences9100408>.
- Madariaga, R., 1977, Implications of stress-drop models of earthquakes for the inversion of stress drop from seismic observations: *Pure and Applied Geophysics PAGEOPH*, v. 115, no. 1–2, p. 301–316, <https://doi.org/10.1007/BF01637111>.
- Polcari, M., Albano, M., Atzori, S., Bignami, C., and Stramondo, S., 2018, The Causative Fault of the 2016 Mwp 6.1 Petermann Ranges Intraplate Earthquake (Central Australia) Retrieved by C- and L-Band InSAR Data: *Remote Sensing*, v. 10, no. 8, p. 1311, <https://doi.org/10.3390/rs10081311>.
- Rajabi, M., Tingay, M., Heidbach, O., Hillis, R.R., and Reynolds, S.D., 2017, The present-day stress field of Australia: *Earth-Science Reviews*, v. 168, no. February, p. 165–189, <https://doi.org/10.1016/j.earscirev.2017.04.003>.
- Vogfjord, K.S., and Langston, C.A., 1987, The Meckering earthquake of 14 October 1968: A possible downward propagating rupture: *Bulletin of the Seismological Society of America*, v. 77, no. 5, p. 1558–1578.
